# Supplementary material
Source: publisher figshare collection journal article supplement (https://acs.figshare.com/ndownloader/files/4144822)
Supplement: Supplementary file 1 [file 4144822]

# Supporting Information

## Photoluminescent Enzymatic Sensor Based on Nanoporous Anodic Alumina

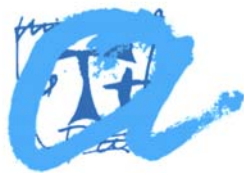

UNIVERSITAT ROVIRA I VIRGILI

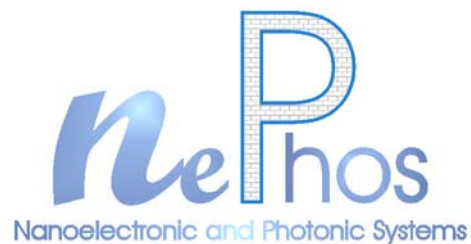

Abel Santos, Gerard Macías, Josep Ferré-Borrull, Josep Pallarès  
and  
Lluís F. Marsal\*

Departament d'Enginyeria Electrònica, Elèctrica i Automàtica  
Universitat Rovira i Virgili  
Avda Països Catalans 26 - 43007 Tarragona (Spain)

## 1S. Fabrication conditions of nanoporous anodic alumina

The NAA samples were fabricated by the two-step anodization process and the fabrication conditions of these are summarized in **Table 1S**.<sup>12</sup>

| Label   | Acid                                               | $V_{an}$ (V) | $t_{an} - 1^{st}$ step (h) | $t_{an} - 2^{nd}$ step (min) | $t_{pw}$ (min) |
|---------|----------------------------------------------------|--------------|----------------------------|------------------------------|----------------|
| Bio (1) |                                                    |              |                            | 90                           | 0              |
| Bio (2) |                                                    |              |                            | "                            | 2.5            |
| Bio (3) |                                                    |              |                            | "                            | 5              |
| Bio (4) |                                                    |              |                            | 105                          | 0              |
| Bio (5) | H <sub>2</sub> C <sub>2</sub> O <sub>4</sub> 0.3 M | 40           | 20                         | "                            | 2.5            |
| Bio (6) |                                                    |              |                            | "                            | 5              |
| Bio (7) |                                                    |              |                            | 120                          | 0              |
| Bio (8) |                                                    |              |                            | "                            | 2.5            |
| Bio (9) |                                                    |              |                            | "                            | 5              |

**Table 1S.** Fabrication conditions of each NAA sample ( $V_{an}$  = Anodization voltage).

## 2S. Geometric characteristics of nanoporous anodic alumina

The geometric characteristics of the resulting NAA samples were estimated by SEM image analysis.

The results are summarized in **Table 2S**.

| Label   | $L_p$ ( $\mu\text{m}$ ) | $d_p$ (nm) | $d_{int}$ (nm) |
|---------|-------------------------|------------|----------------|
| Bio (1) | $5.3 \pm 0.1$           | $30 \pm 2$ |                |
| Bio (2) | “                       | $34 \pm 2$ |                |
| Bio (3) | “                       | $39 \pm 2$ |                |
| Bio (4) | $6.2 \pm 0.1$           | $30 \pm 2$ | $103 \pm 4$    |
| Bio (5) | ”                       | $34 \pm 2$ |                |
| Bio (6) | “                       | $39 \pm 2$ |                |
| Bio (7) | $7.1 \pm 0.1$           | $30 \pm 2$ |                |
| Bio (8) | “                       | $34 \pm 2$ |                |
| Bio (9) | ”                       | $39 \pm 2$ |                |

**Table 2S.** Geometric characteristics of each NAA sample ( $d_{int}$  = Interpore distance).

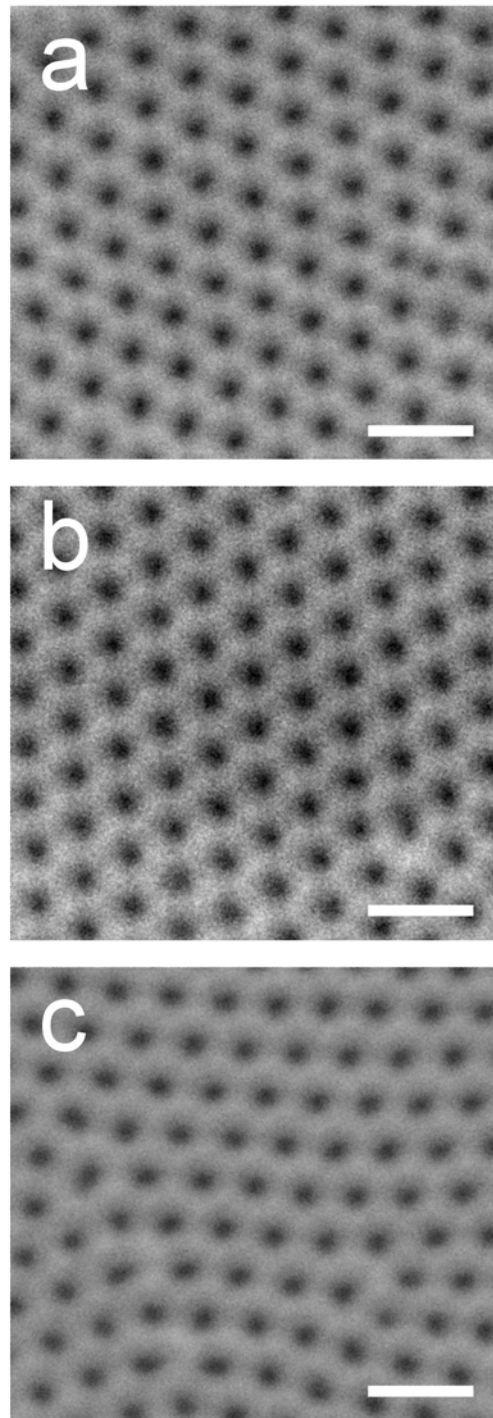

**Figure 1S.** Set of top view SEM images of several NAA samples (scale bar = 200 nm).

a) Bio (1)  $d_p = 30 \pm 2$  nm. b) Bio (2)  $d_p = 34 \pm 2$  nm. c) Bio (3)  $d_p = 39 \pm 2$  nm.

### 3S. Change in the effective optical thickness increment

The change in the effective optical thickness increment was estimated from the PL spectra by calculating the slope of the linear fitting  $m$  versus  $\lambda^{-1}$ . The results are summarized in **Table 3S**.

| Label   | $\Delta OT_{eff} (\%) - \text{STAGE}$ |                |                        |
|---------|---------------------------------------|----------------|------------------------|
|         | APTES Functionalization               | GTA Activation | Trypsin Immobilization |
| Bio (1) | $0.6 \pm 0.2$                         | $1.2 \pm 0.2$  | $1.8 \pm 0.3$          |
| Bio (2) | $0.8 \pm 0.3$                         | $0.9 \pm 0.3$  | $3.3 \pm 0.3$          |
| Bio (3) | $0.4 \pm 0.2$                         | $0.3 \pm 0.2$  | $2.6 \pm 0.3$          |
| Bio (4) | $0.6 \pm 0.3$                         | $0.7 \pm 0.3$  | $1.9 \pm 0.3$          |
| Bio (5) | $0.8 \pm 0.3$                         | $0.7 \pm 0.3$  | $2.4 \pm 0.3$          |
| Bio (6) | $0.7 \pm 0.3$                         | $1.0 \pm 0.3$  | $1.8 \pm 0.3$          |
| Bio (7) | $0.6 \pm 0.3$                         | $0.8 \pm 0.2$  | $1.7 \pm 0.2$          |
| Bio (8) | $0.6 \pm 0.3$                         | $1.0 \pm 0.3$  | $1.4 \pm 0.3$          |
| Bio (9) | $0.5 \pm 0.2$                         | $0.6 \pm 0.2$  | $2.6 \pm 0.3$          |

**Table 3S.** Change in the effective optical thickness increment after each fabrication stage.

#### 4S. Fourier transform infrared analysis

Each stage of the fabrication process was studied by Fourier transform infrared (FTIR). To this end, the remaining aluminum substrate was removed from the backside of a NAA proof by wet chemical etching in a saturated solution of hydrochloric acid and cupric chloride (HCl / CuCl<sub>2</sub>). The results are shown in **Figure 2S**. The FTIR spectrum of the as-produced NAA sample was used as a background. The peaks located around 3300, 1600 and 1000 cm<sup>-1</sup> are related to primary and secondary amines, which increase after each fabrication stage (i.e. APTES functionalization, GTA activation and Trypsin immobilization).

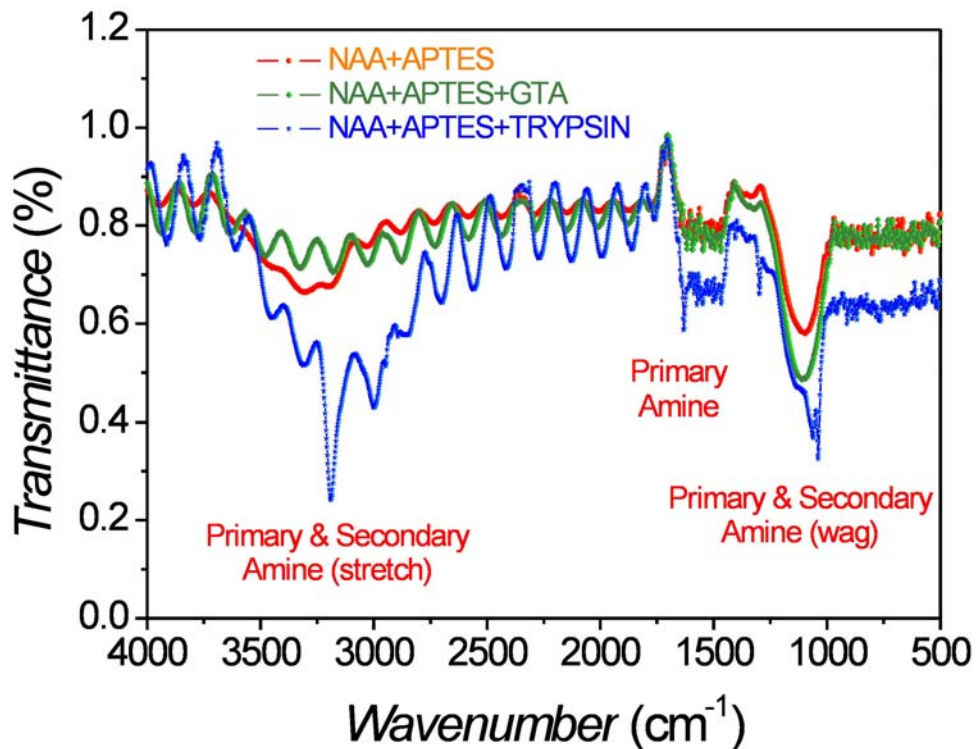

**Figure 2S.** FTIR transmittance spectra of a NAA sample after each stage of the fabrication process (background = as-produced NAA).
